# Supplementary material for: Screening and affinity optimization of single domain antibody targeting the SARS-CoV-2 nucleocapsid protein
Source: PeerJ journal article supplement (doi:10.7717/peerj.17846), 2024-08-30

Affinity analysis of pN01

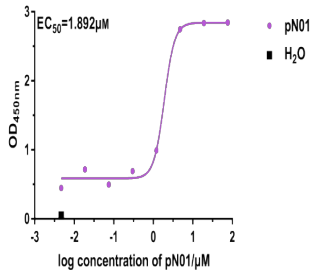

Affinity analysis of pN02

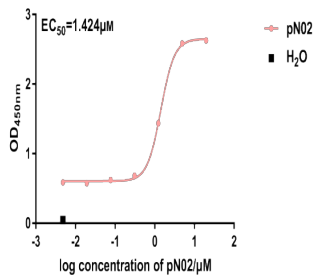

Affinity analysis of pN03

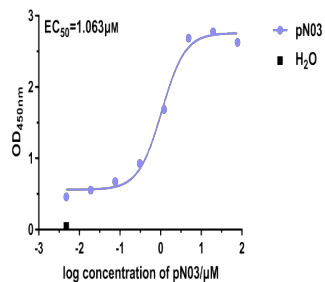

Affinity analysis of pN04

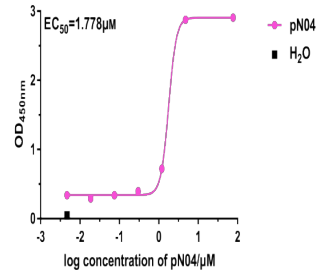

ELISA

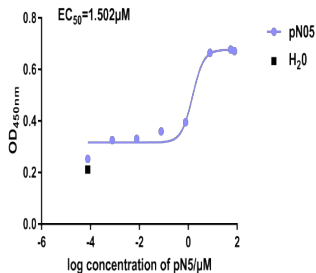

Affinity analysis of pN06

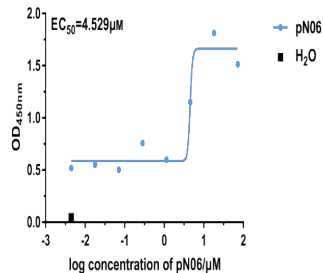

ELISA

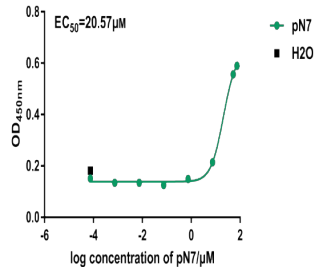

Affinity analysis of pN08

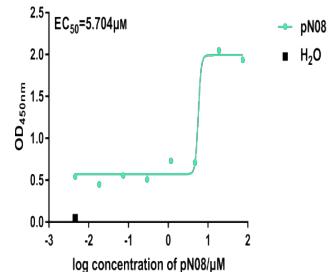

Supplement: FigS1.pdf [file FigS1.pdf]
