# Supplementary material for: Screening and affinity optimization of single domain antibody targeting the SARS-CoV-2 nucleocapsid protein
Source: PeerJ journal article supplement (doi:10.7717/peerj.17846), 2024-08-30
Supplement: RAW_DATA.zip [file RAW_DATA.zip]

| **Certificate of Analysis** | | | | | | | | |
| --- | --- | --- | --- | --- | --- | --- | --- | --- |
| **Gene Name** | pN03 | | | | **Order No.** | Y0044841-3 | | |
| **Lot No.** | M3704/Y0044841-3 | | | | **Cloning Vector** | pET-28a+ | | |
| **Cloning Sites** | NdeI-XhoI | | | | **Insert Size** | 393 | | |
| **QC Results** | | | | | | | | |
| **Test Items** | | **Specifications** | | | | | | **Results** |
| **Insert Sequence** | | Insert sequence results consistent with target | | | | | | Pass |
| **Vector Sequence** | | Flanking sequence consistent with expected | | | | | | N/A |
| **ORF Across Junction** | | Correct and consistent with target | | | | | | N/A |
| **Restriction Digest** | | Expected fragment sizes observed | | | | | | Pass |
| **PCR Amplification** | | Correct without non - specific bands | | | | | | N/A |
| **DNA Quantity/Quality** | | Actual yield (by A 260 ) | | | | | | 4ugug |
| Concentration (n/a if lyophilized) | | | | | | N/A |
| Purity (A 260/A280 = 1.8 - 2.0) | | | | | | Pass |
| # of Tubes | | | | | | 1 |
| Matrix | | | | | | ddH2O |
| **Endotoxin Test** | | Verified, <0.1 EU/µg (Endo-Free Preps Only) | | | | | | N/A |
| **Appearance** | | Clear, no visible particles | | | | | | Pass |
| **Label** | | Correct and white | | | | | | Pass |
| **Comments** | | NA | | | | | | |
| **Restriction Digestion Map** | | | | | | | | |
| 1 2 M | | | | | | | | |
| 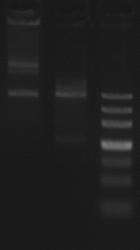 | | | **Lane1**:plasmid DNA  **Lane2**:Digested with  MluI/XhoI  **Lane M**: DNA Marker | | | | 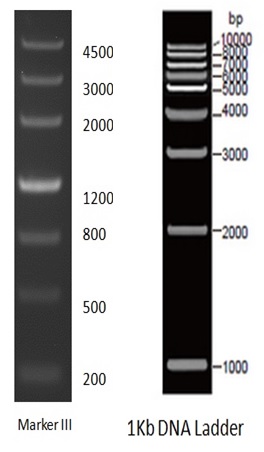 | |
| **Certified by:LOIS** | | | | **Date:**2021-03-13 | | | | |

| **Plasmid Map and Gene Sequence** | |
| --- | --- |
| **Gene Name：**pN03 | |
| **Order No：**Y0044841-3 | **Date：**2021-03-13 |
| **Vector Name：**pET-28a+ | **Clone site：**NdeI-XhoI |
| The genepN03  has been cloned intopET-28a+  by NdeI-XhoI | |
| **Plasmid Map** | |


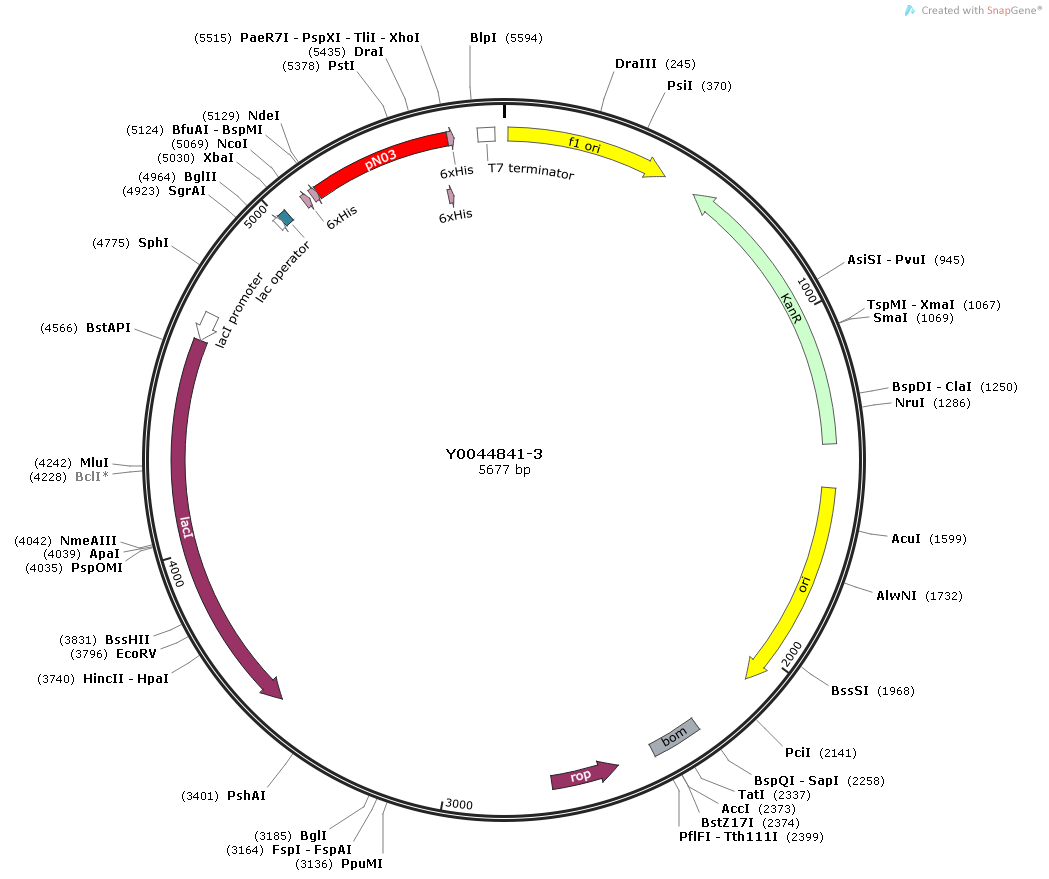


**Gene Sequence：**

catatgCAGGTTCAATTACTTGAAAGCGGTGGTGGTTTAGTTCAGCCGGGTGGTAGCTTACGTTTATCATGTGCAGCAAGCGGTGTTTCCGTAAATAATTATGATATGACCTGGGTTAGACAGGCACCGGGTAAAGGTCTGGAATGGGTTAGTACGATTAATGTTAGCGATGGGAGCACCTACTATGCAGATAGCGTTAAAGGTCGTTTTACCATCAGCCGGGACAATAGCAAAAACACCCTGTATCTGCAGATGAATAGCCTGCGTGCAGAAGACACCGCAGTTTATTATTGTGCAGCACGGGGTTTAAATGATGAAGAAATGGATAGCTGGGGACAAGGAACACTGGTGACCGTTAGCAGTCATCATCACCACCATCACtaatagctcgag
