# Supplementary figures and images for: Screening and affinity optimization of single domain antibody targeting the SARS-CoV-2 nucleocapsid protein
Source: PeerJ journal article supplement (doi:10.7717/peerj.17846), 2024-08-30

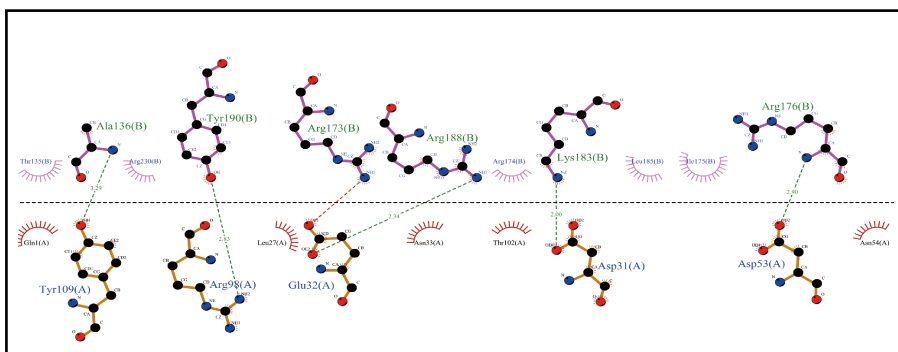

pN01&NTD

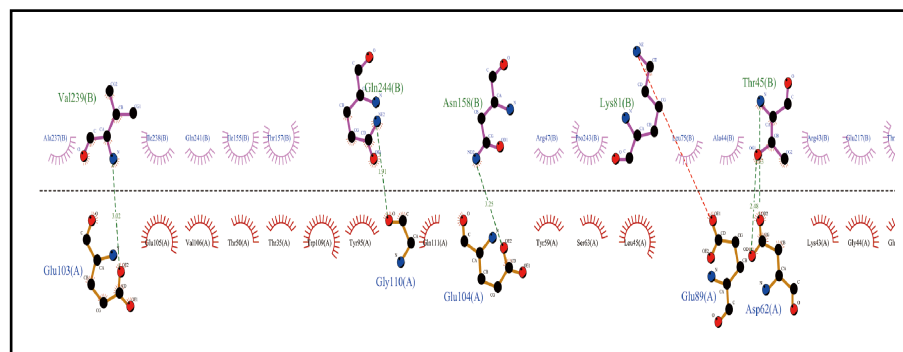

pN02&NTD

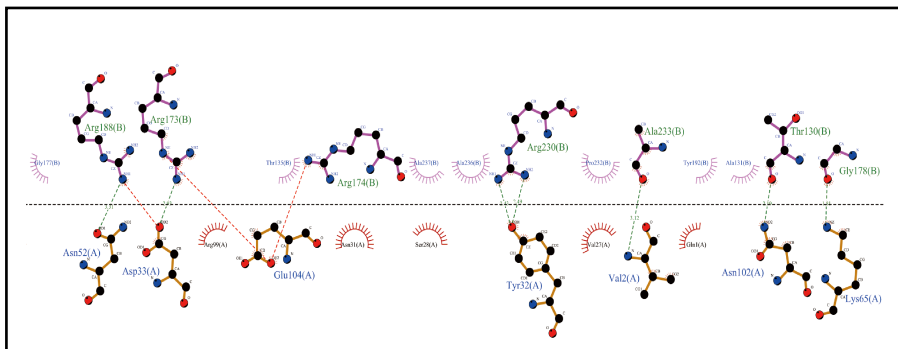

pN03&NTD

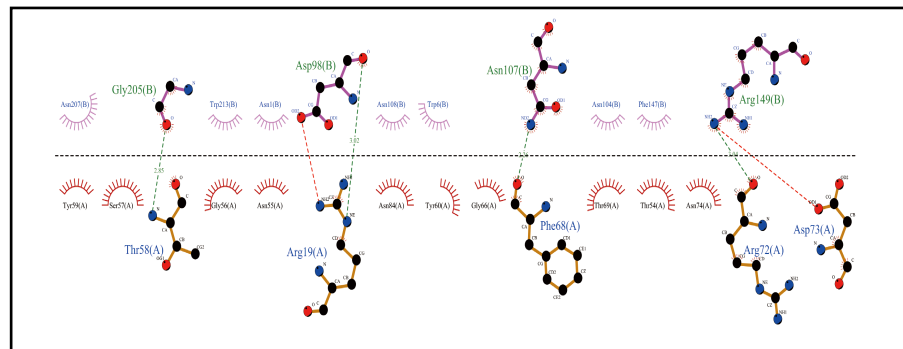

pN04&NTD

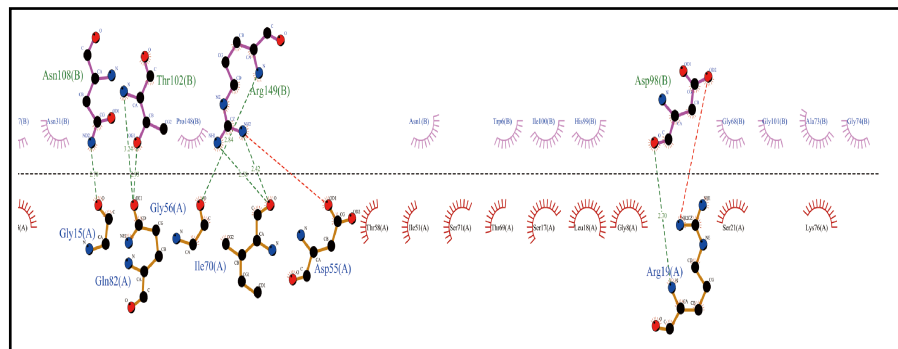

pN05&NTD

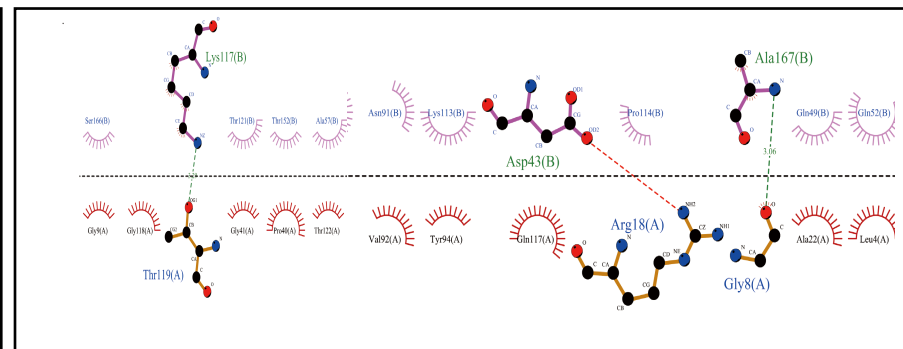

pN06&CTD

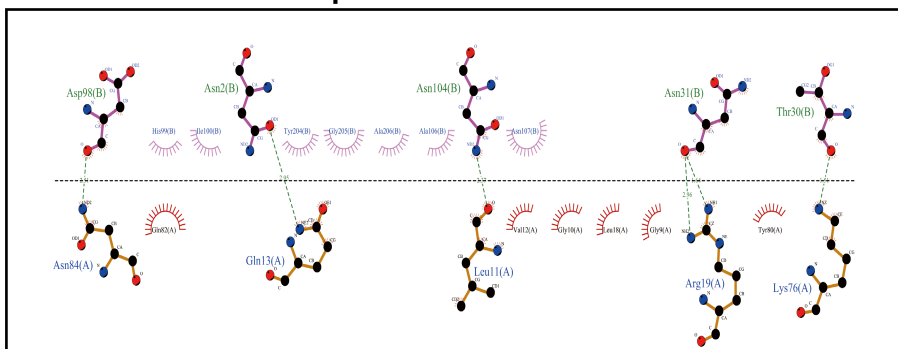

pN07&NTD

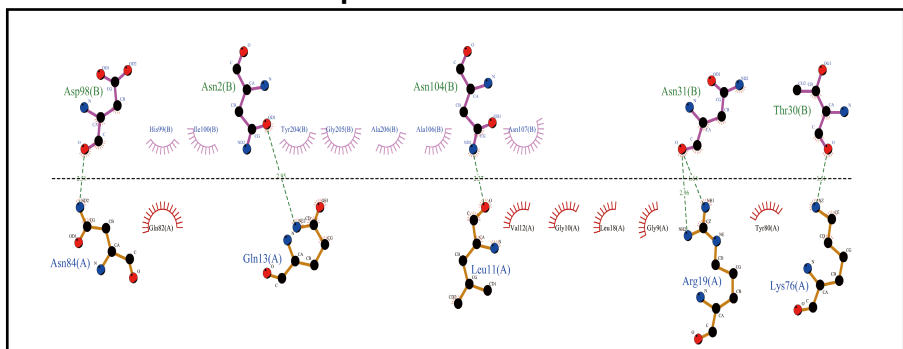

pN08&NTD

Supplement: FigS2.pdf [file FigS2.pdf]
